# Supplementary material for: Fatty Acid Composition of Cosmetic Argan Oil: Provenience and Authenticity Criteria
Source: PubMed Central journal article supplement (PMC7570657; doi:10.3390/molecules25184080), 2020-09-07
Supplement: molecules-25-04080-s001.pdf [file molecules-25-04080-s001.pdf]

**Table S1.** Time of processing, geoenvironmental and climatic information of the sampling locations together with the isotopic composition of hydrogen and oxygen in precipitation.

| Province of the sample collection | Time of proces. | Lat    | Log    | Altitude | Dist. from the coast | rain $\delta^{18}\text{O}$ | rain $\delta^2\text{H}$ | T    | rain | Rel. hum. | Aridity Index |
|-----------------------------------|-----------------|--------|--------|----------|----------------------|----------------------------|-------------------------|------|------|-----------|---------------|
|                                   |                 |        |        | m        | km                   | ‰                          | ‰                       | °C   | mm   | °F        |               |
| Chtouka ait baha                  | Apr-2017        | 30.075 | -9.046 | 542      | 59                   | -3.7                       | -15                     | 21.4 | 235  | 47.2      | 7.50          |
| Chtouka ait baha                  | Nov-2018        | 30.011 | -9.412 | 542      | 28                   | -4.8                       | -23                     | 21.4 | 235  | 47.2      | 7.50          |
| Chtouka ait baha                  | May-2018        | 30.011 | -9.412 | 542      | 29                   | -3.9                       | -17                     | 21.4 | 235  | 47.2      | 7.50          |
| Chtouka ait baha                  | Nov-2018        | 30.528 | -9.333 | 684      | 31                   | -4.1                       | -18                     | 20.6 | 277  | 46.2      | 9.06          |
| Chtouka ait baha                  | Apr-2018        | 30.528 | -9.333 | 684      | 31                   | -4.1                       | -18                     | 20.6 | 277  | 46.2      | 9.06          |
| Chtouka ait baha                  | Nov-2018        | 30.027 | -9.235 | 542      | 42                   | -4.7                       | -22                     | 21.4 | 235  | 47.2      | 7.50          |
| Chtouka ait baha                  | May-2018        | 30.027 | -9.235 | 542      | 42                   | -4.7                       | -22                     | 21.4 | 235  | 47.2      | 7.50          |
| Chtouka ait baha                  | May-2018        | 30.027 | -9.235 | 542      | 43                   | -4.7                       | -22                     | 21.4 | 235  | 47.2      | 7.50          |
| Chtouka ait baha                  | Dec-2018        | 30.093 | -9.157 | 542      | 49                   | -4.8                       | -23                     | 21.4 | 235  | 47.2      | 7.50          |
| Chtouka ait baha                  | May-2018        | 30.093 | -9.157 | 542      | 49                   | -4.8                       | -23                     | 21.4 | 235  | 47.2      | 7.50          |
| Essaouira                         | Nov-2018        | 31.519 | -9.450 | 317      | 26                   | -4.4                       | -21                     | 19.9 | 297  | 98.1      | 9.92          |
| Essaouira                         | Dec-2018        | 31.539 | -9.546 | 139      | 16                   | -4.0                       | -18                     | 19.3 | 271  | 100       | 9.23          |
| Essaouira                         | Nov-2018        | 31.555 | -9.608 | 139      | 11                   | -4.0                       | -18                     | 19.3 | 271  | 100       | 9.23          |
| Essaouira                         | Jan-2019        | 31.536 | -9.457 | 317      | 24                   | -4.5                       | -21                     | 19.9 | 297  | 98.1      | 9.92          |
| Essaouira                         | Dec-2018        | 31.551 | -9.475 | 317      | 24                   | -4.4                       | -21                     | 19.9 | 297  | 98.1      | 9.92          |
| Essaouira                         | Dec-2018        | 31.282 | -9.719 | 310      | 9                    | -4.4                       | -21                     | 19.6 | 264  | 63.3      | 8.93          |
| Essaouira                         | Dec-2018        | 31.409 | -9.673 | 310      | 15                   | -4.4                       | -21                     | 19.6 | 264  | 63.3      | 8.93          |
| Essaouira                         | Jan-2019        | 31.282 | -9.719 | 310      | 9                    | -4.4                       | -21                     | 19.6 | 264  | 63.3      | 8.93          |
| Essaouira                         | Nov-2018        | 31.282 | -9.719 | 310      | 9                    | -4.2                       | -18                     | 19.6 | 264  | 63.3      | 8.93          |
| Essaouira                         | Dec-2018        | 31.282 | -9.719 | 310      | 9                    | -4.2                       | -18                     | 19.6 | 264  | 63.3      | 8.93          |
| Essaouira                         | Jan-2019        | 31.282 | -9.719 | 310      | 9                    | -4.2                       | -18                     | 19.6 | 264  | 63.3      | 8.93          |
| Essaouira                         | Oct-2018        | 31.282 | -9.719 | 310      | 9                    | -4.2                       | -18                     | 19.6 | 264  | 63.3      | 8.93          |
| Essaouira                         | Dec-2018        | 30.633 | -9.884 | 299      | 2                    | -4.2                       | -18                     | 19.6 | 264  | 63.3      | 8.93          |
| Essaouira                         | May-2018        | 31.002 | -9.683 | 310      | 13                   | -4.4                       | -20                     | 19.6 | 264  | 63.3      | 8.93          |
| Essaouira                         | Jan-2019        | 31.225 | -9.653 | 310      | 17                   | -5.2                       | -26                     | 19.6 | 264  | 63.3      | 8.93          |
| Essaouira                         | Mar-2018        | 31.225 | -9.653 | 310      | 17                   | -5.2                       | -26                     | 19.6 | 264  | 63.3      | 8.93          |
| Essaouira                         | Jan-2019        | 31.551 | -9.475 | 317      | 23                   | -4.4                       | -21                     | 19.9 | 297  | 60.3      | 9.92          |
| Essaouira                         | Dec-2018        | 31.568 | -9.473 | 317      | 22                   | -4.4                       | -21                     | 19.9 | 297  | 60.3      | 9.92          |

|            |          |        |        |      |     |      |     |      |     |      |       |
|------------|----------|--------|--------|------|-----|------|-----|------|-----|------|-------|
| Essaouira  | May-2018 | 31.554 | -9.302 | 317  | 38  | -4.8 | -23 | 19.9 | 297 | 60.3 | 9.92  |
| Essaouira  | Mar-2018 | 31.082 | -9.749 | 310  | 8   | -4.4 | -22 | 19.6 | 264 | 63.3 | 8.93  |
| Essaouira  | Nov-2018 | 31.277 | -8.894 | 240  | 35  | -4.4 | -21 | 20.8 | 314 | 58.9 | 10.19 |
| Essaouira  | Jan-2019 | 31.536 | -9.457 | 317  | 24  | -4.5 | -21 | 19.9 | 297 | 60.3 | 9.92  |
| Essaouira  | Dec-2018 | 31.554 | -9.302 | 319  | 24  | -4.5 | -21 | 19.9 | 297 | 60.3 | 9.92  |
| Sidi Ifni  | Jan-2019 | 29.195 | -10.13 | 251  | 17  | -3.8 | -16 | 20.9 | 156 | 63.5 | 5.05  |
| Sidi Ifni  | Jan-2019 | 29.336 | -9.642 | 536  | 47  | -6.0 | -31 | 21.5 | 163 | 49.7 | 5.15  |
| Sidi Ifni  | Apr-2018 | 29.336 | -9.642 | 537  | 47  | -6.0 | -31 | 21.5 | 163 | 49.7 | 5.15  |
| Sidi Ifni  | Dec-2018 | 29.195 | -10.13 | 251  | 17  | -3.8 | -16 | 20.9 | 156 | 63.5 | 5.05  |
| Sidi Ifni  | Jan-2019 | 29.361 | -9.732 | 536  | 38  | -5.9 | -30 | 21.5 | 163 | 49.7 | 5.15  |
| Sidi Ifni  | Apr-2018 | 29.361 | -9.732 | 537  | 38  | -5.8 | -29 | 21.5 | 163 | 49.7 | 5.15  |
| Sidi Ifni  | Dec-2018 | 29.195 | -10.13 | 251  | 20  | -3.8 | -16 | 20.9 | 156 | 63.5 | 5.05  |
| Taroudante | Jan-2019 | 30.754 | -8.515 | 1114 | 124 | -5.8 | -30 | 19.5 | 248 | 39.8 | 8.42  |
| Taroudante | Mar-2018 | 30.754 | -8.515 | 1114 | 124 | -5.8 | -30 | 19.5 | 248 | 39.8 | 8.42  |
| Taroudante | Dec-2018 | 30.379 | -8.694 | 1035 | 87  | -4.7 | -22 | 20.1 | 201 | 39.1 | 6.68  |
| Taroudante | Apr-2018 | 30.379 | -8.694 | 1035 | 87  | -4.7 | -22 | 20.1 | 201 | 39.1 | 6.68  |
| Taroudante | Jan-2019 | 30.705 | -8.886 | 1035 | 80  | -5.9 | -31 | 19.6 | 248 | 39.8 | 8.40  |
| Taroudante | Apr-2018 | 30.705 | -8.886 | 1114 | 85  | -6.9 | -38 | 19.6 | 248 | 39.8 | 8.40  |
| Taroudante | Jan-2019 | 30.304 | -8.487 | 1270 | 109 | -6.3 | -33 | 19.3 | 182 | 36.0 | 6.22  |
| Taroudante | Nov-2018 | 30.304 | -8.487 | 1270 | 109 | -6.3 | -33 | 19.3 | 182 | 36.0 | 6.22  |
| Taroudante | Apr-2018 | 30.304 | -8.487 | 1270 | 109 | -6.3 | -33 | 19.3 | 182 | 36.0 | 6.22  |
| Taroudante | Sep-2018 | 30.304 | -8.487 | 1270 | 109 | -6.3 | -33 | 19.3 | 182 | 36.0 | 6.22  |
| Taroudante | Jan-2019 | 30.379 | -8.694 | 1035 | 87  | -4.7 | -22 | 20.1 | 201 | 39.1 | 6.68  |
| Taroudante | Feb-2018 | 30.379 | -8.694 | 1035 | 87  | -4.7 | -22 | 20.1 | 201 | 39.1 | 6.68  |
| Taroudante | Jan-2019 | 30.506 | -8.609 | 1114 | 100 | -4.4 | -20 | 19.6 | 248 | 39.8 | 8.40  |
| Taroudante | May-2018 | 30.506 | -8.609 | 1114 | 100 | -4.4 | -20 | 19.6 | 248 | 39.8 | 8.40  |
| Taroudante | Dec-2018 | 30.609 | -9.077 | 648  | 59  | -4.3 | -20 | 20.6 | 277 | 46.2 | 9.06  |
| Taroudante | Apr-2018 | 30.609 | -9.077 | 648  | 59  | -4.3 | -20 | 20.6 | 277 | 46.2 | 9.06  |
| Tiznite    | Jan-2019 | 30.616 | -9.349 | 309  | 8   | -4.1 | -18 | 19.6 | 264 | 63.3 | 8.93  |
| Tiznite    | Apr-2018 | 31.282 | -9.719 | 309  | 8   | -4.1 | -18 | 19.6 | 264 | 63.3 | 8.93  |
| Tiznite    | Dec-2018 | 29.631 | -9.389 | 784  | 50  | -4.8 | -22 | 20.8 | 207 | 45.5 | 6.71  |
| Tiznite    | Feb-2018 | 29.631 | -9.389 | 784  | 50  | -4.8 | -22 | 20.8 | 207 | 45.5 | 6.71  |
| Tiznite    | Mar-2018 | 29.631 | -9.389 | 784  | 49  | -4.8 | -22 | 20.8 | 207 | 45.5 | 6.71  |
| Tiznite    | Nov-2018 | 29.631 | -9.389 | 542  | 59  | -3.7 | -15 | 21.4 | 235 | 47.2 | 7.50  |
| Tiznite    | Dec-2018 | 29.463 | -9.664 | 536  | 42  | -5.3 | -26 | 21.5 | 163 | 49.7 | 5.15  |
| Tiznite    | May-2018 | 29.463 | -9.664 | 536  | 42  | -5.3 | -26 | 21.5 | 163 | 49.7 | 5.15  |

|         |          |        |        |     |    |      |     |      |     |      |      |
|---------|----------|--------|--------|-----|----|------|-----|------|-----|------|------|
| Tiznite | Jan-2019 | 29.601 | -9.906 | 393 | 11 | -4.2 | -18 | 20.6 | 205 | 58.4 | 6.71 |
| Tiznite | Apr-2018 | 29.601 | -9.906 | 393 | 11 | -4.2 | -18 | 20.6 | 205 | 58.4 | 6.71 |

**Table S2.** Acidity and fatty acid composition (in wt. % of total FA) of argan oils from different sampling locations.

| Region of the sample | Acidity | C14:0             | C16:0 | C16:1 | C18:0 | C18:1 | C18:2 | C18:3 | C20:0 | C20:1 | C22:0 | C22:1 | C24:0 | C18:1 T | C18:2 CT | C18:3 CTC | C18:2 CT + C18:3 CTC |
|----------------------|---------|-------------------|-------|-------|-------|-------|-------|-------|-------|-------|-------|-------|-------|---------|----------|-----------|----------------------|
|                      | wt %    | wt. % of total FA |       |       |       |       |       |       |       |       |       |       |       |         |          |           |                      |
| Agadir Idaw Tanane   | 0.53    | 0.13              | 12.76 | 0.13  | 5.74  | 48.82 | 31.25 | 0.17  | 0.35  | 0.38  | 0.10  | 0.02  | 0.05  | 0.02    | 0.02     | 0.07      | 0.09                 |
| Chtouka ait baha     | 0.43    | 0.15              | 14.07 | 0.13  | 6.54  | 47.17 | 30.74 | 0.15  | 0.39  | 0.35  | 0.12  | 0.01  | 0.07  | 0.02    | 0.02     | 0.06      | 0.08                 |
| Chtouka ait baha     | 0.44    | 0.13              | 13.68 | 0.13  | 7.02  | 43.79 | 34.03 | 0.17  | 0.43  | 0.33  | 0.11  | 0.02  | 0.06  | 0.02    | 0.02     | 0.06      | 0.08                 |
| Chtouka ait baha     | 0.49    | 0.13              | 13.16 | 0.12  | 6.81  | 43.20 | 35.32 | 0.17  | 0.43  | 0.34  | 0.14  | 0.01  | 0.07  | 0.02    | 0.03     | 0.06      | 0.09                 |
| Chtouka ait baha     | 1.41    | 0.16              | 13.38 | 0.11  | 6.48  | 47.06 | 31.58 | 0.17  | 0.40  | 0.35  | 0.12  | 0.02  | 0.06  | 0.02    | 0.02     | 0.06      | 0.09                 |
| Chtouka ait baha     | 0.68    | 0.15              | 12.99 | 0.12  | 6.42  | 46.53 | 32.58 | 0.17  | 0.40  | 0.35  | 0.12  | 0.02  | 0.06  | 0.02    | 0.02     | 0.06      | 0.08                 |
| Chtouka ait baha     | 0.71    | 0.14              | 12.74 | 0.12  | 6.13  | 45.88 | 33.83 | 0.17  | 0.37  | 0.35  | 0.11  | 0.02  | 0.05  | 0.02    | 0.02     | 0.06      | 0.08                 |
| Chtouka ait baha     | 0.44    | 0.15              | 13.25 | 0.13  | 6.46  | 46.07 | 32.74 | 0.16  | 0.41  | 0.34  | 0.12  | 0.01  | 0.06  | 0.02    | 0.02     | 0.06      | 0.08                 |
| Chtouka ait baha     | 0.48    | 0.14              | 12.74 | 0.11  | 6.43  | 44.07 | 35.26 | 0.17  | 0.40  | 0.34  | 0.13  | 0.02  | 0.06  | 0.02    | 0.03     | 0.06      | 0.09                 |
| Chtouka ait baha     | 0.32    | 0.14              | 13.17 | 0.12  | 6.61  | 45.43 | 33.35 | 0.17  | 0.40  | 0.33  | 0.11  | 0.01  | 0.06  | 0.02    | 0.02     | 0.06      | 0.08                 |
| Chtouka ait baha     | 0.73    | 0.14              | 12.86 | 0.11  | 6.73  | 43.52 | 35.34 | 0.18  | 0.43  | 0.34  | 0.15  | 0.01  | 0.07  | 0.03    | 0.03     | 0.06      | 0.09                 |
| Essaouira            | 0.35    | 0.14              | 13.62 | 0.15  | 5.84  | 50.41 | 28.65 | 0.15  | 0.37  | 0.38  | 0.11  | 0.01  | 0.06  | 0.03    | 0.02     | 0.06      | 0.08                 |
| Essaouira            | 5.45    | 0.13              | 11.98 | 0.11  | 5.74  | 45.44 | 35.37 | 0.17  | 0.38  | 0.37  | 0.13  | 0.02  | 0.06  | 0.02    | 0.02     | 0.06      | 0.09                 |
| Essaouira            | 1.15    | 0.12              | 11.50 | 0.12  | 5.80  | 43.40 | 37.92 | 0.18  | 0.34  | 0.34  | 0.10  | 0.01  | 0.04  | 0.02    | 0.02     | 0.06      | 0.08                 |
| Essaouira            | 1.46    | 0.15              | 13.27 | 0.08  | 6.51  | 39.46 | 39.32 | 0.20  | 0.38  | 0.36  | 0.09  | 0.01  | 0.04  | 0.02    | 0.02     | 0.06      | 0.08                 |
| Essaouira            | 0.49    | 0.16              | 13.80 | 0.15  | 5.45  | 48.11 | 31.21 | 0.14  | 0.34  | 0.37  | 0.10  | 0.02  | 0.05  | 0.03    | 0.02     | 0.06      | 0.08                 |
| Essaouira            | 0.79    | 0.11              | 12.21 | 0.11  | 5.98  | 46.18 | 34.23 | 0.18  | 0.38  | 0.34  | 0.10  | 0.02  | 0.05  | 0.02    | 0.02     | 0.06      | 0.09                 |
| Essaouira            | 3.04    | 0.14              | 12.65 | 0.11  | 5.55  | 48.34 | 32.03 | 0.17  | 0.36  | 0.37  | 0.11  | 0.02  | 0.05  | 0.02    | 0.02     | 0.06      | 0.08                 |
| Essaouira            | 0.88    | 0.14              | 12.45 | 0.11  | 5.62  | 48.85 | 31.66 | 0.16  | 0.35  | 0.39  | 0.11  | 0.02  | 0.05  | 0.03    | 0.02     | 0.06      | 0.08                 |
| Essaouira            | 0.54    | 0.14              | 12.88 | 0.12  | 5.66  | 46.97 | 33.07 | 0.16  | 0.35  | 0.36  | 0.11  | 0.02  | 0.05  | 0.02    | 0.02     | 0.06      | 0.08                 |
| Essaouira            | 1.10    | 0.14              | 12.76 | 0.13  | 5.68  | 47.60 | 32.54 | 0.16  | 0.36  | 0.37  | 0.10  | 0.02  | 0.05  | 0.02    | 0.02     | 0.06      | 0.08                 |
| Essaouira            | 0.58    | 0.14              | 12.77 | 0.12  | 6.66  | 44.44 | 34.65 | 0.17  | 0.42  | 0.32  | 0.12  | 0.01  | 0.06  | 0.02    | 0.02     | 0.06      | 0.08                 |
| Essaouira            | 0.60    | 0.14              | 12.95 | 0.13  | 6.12  | 46.33 | 33.08 | 0.17  | 0.40  | 0.37  | 0.13  | 0.02  | 0.07  | 0.02    | 0.02     | 0.06      | 0.08                 |
| Essaouira            | 0.86    | 0.13              | 12.67 | 0.13  | 5.62  | 48.12 | 32.14 | 0.16  | 0.36  | 0.38  | 0.11  | 0.02  | 0.05  | 0.02    | 0.02     | 0.06      | 0.09                 |
| Essaouira            | 0.49    | 0.14              | 12.73 | 0.12  | 5.92  | 46.61 | 33.28 | 0.17  | 0.38  | 0.37  | 0.12  | 0.02  | 0.06  | 0.02    | 0.02     | 0.06      | 0.08                 |
| Essaouira            | 0.38    | 0.13              | 12.31 | 0.12  | 5.56  | 46.50 | 34.21 | 0.17  | 0.35  | 0.37  | 0.11  | 0.02  | 0.05  | 0.02    | 0.02     | 0.06      | 0.08                 |
| Essaouira            | 0.38    | 0.13              | 12.47 | 0.12  | 5.79  | 46.29 | 34.04 | 0.17  | 0.36  | 0.36  | 0.11  | 0.02  | 0.05  | 0.02    | 0.02     | 0.06      | 0.09                 |
| Essaouira            | 0.75    | 0.15              | 12.87 | 0.13  | 5.81  | 48.42 | 31.37 | 0.16  | 0.38  | 0.41  | 0.13  | 0.02  | 0.06  | 0.02    | 0.02     | 0.07      | 0.09                 |

|            |      |      |       |      |      |       |       |      |      |      |      |      |      |      |      |      |      |
|------------|------|------|-------|------|------|-------|-------|------|------|------|------|------|------|------|------|------|------|
| Essaouira  | 0.42 | 0.10 | 13.47 | 0.14 | 5.84 | 46.93 | 32.33 | 0.16 | 0.36 | 0.39 | 0.11 | 0.01 | 0.05 | 0.02 | 0.02 | 0.07 | 0.09 |
| Essaouira  | 0.38 | 0.15 | 13.20 | 0.13 | 5.68 | 47.44 | 32.23 | 0.16 | 0.35 | 0.38 | 0.11 | 0.02 | 0.06 | 0.02 | 0.02 | 0.06 | 0.08 |
| Essaouira  | 0.33 | 0.13 | 12.86 | 0.13 | 5.27 | 48.77 | 31.68 | 0.15 | 0.33 | 0.39 | 0.12 | 0.01 | 0.06 | 0.02 | 0.02 | 0.06 | 0.09 |
| Essaouira  | 0.36 | 0.16 | 13.08 | 0.12 | 5.82 | 47.13 | 32.53 | 0.16 | 0.36 | 0.38 | 0.10 | 0.02 | 0.05 | 0.02 | 0.02 | 0.06 | 0.08 |
| Essaouira  | 0.26 | 0.12 | 12.57 | 0.12 | 5.81 | 44.96 | 35.25 | 0.18 | 0.37 | 0.33 | 0.11 | 0.02 | 0.06 | 0.02 | 0.02 | 0.06 | 0.08 |
| Essaouira  | 0.39 | 0.14 | 12.71 | 0.12 | 5.65 | 46.92 | 33.26 | 0.16 | 0.35 | 0.38 | 0.12 | 0.01 | 0.06 | 0.02 | 0.02 | 0.06 | 0.08 |
| Sidi Ifni  | 1.07 | 0.14 | 13.82 | 0.14 | 6.82 | 50.78 | 27.07 | 0.14 | 0.43 | 0.36 | 0.12 | 0.01 | 0.07 | 0.02 | 0.02 | 0.07 | 0.09 |
| Sidi Ifni  | 0.38 | 0.15 | 14.76 | 0.16 | 7.23 | 47.81 | 28.63 | 0.14 | 0.48 | 0.32 | 0.13 | 0.01 | 0.08 | 0.02 | 0.02 | 0.06 | 0.09 |
| Sidi Ifni  | 0.55 | 0.14 | 13.64 | 0.16 | 6.45 | 48.74 | 29.64 | 0.15 | 0.43 | 0.34 | 0.14 | 0.01 | 0.07 | 0.03 | 0.02 | 0.06 | 0.08 |
| Sidi Ifni  | 0.54 | 0.14 | 13.83 | 0.16 | 6.62 | 47.57 | 30.48 | 0.15 | 0.43 | 0.32 | 0.12 | 0.01 | 0.07 | 0.02 | 0.02 | 0.06 | 0.08 |
| Sidi Ifni  | 0.49 | 0.15 | 12.54 | 0.12 | 6.83 | 44.49 | 34.62 | 0.17 | 0.43 | 0.32 | 0.14 | 0.01 | 0.06 | 0.02 | 0.02 | 0.06 | 0.08 |
| Sidi Ifni  | 0.22 | 0.14 | 13.55 | 0.16 | 6.53 | 46.50 | 31.88 | 0.15 | 0.45 | 0.32 | 0.14 | 0.01 | 0.07 | 0.03 | 0.02 | 0.06 | 0.08 |
| Sidi Ifnl  | 0.42 | 0.14 | 14.21 | 0.14 | 6.90 | 47.74 | 29.52 | 0.15 | 0.49 | 0.36 | 0.16 | 0.01 | 0.09 | 0.03 | 0.02 | 0.06 | 0.09 |
| Taroudante | 0.32 | 0.14 | 13.36 | 0.13 | 5.36 | 50.72 | 29.20 | 0.15 | 0.31 | 0.37 | 0.09 | 0.02 | 0.05 | 0.03 | 0.02 | 0.06 | 0.08 |
| Taroudante | 0.47 | 0.14 | 12.61 | 0.12 | 5.74 | 46.07 | 34.13 | 0.17 | 0.36 | 0.38 | 0.12 | 0.02 | 0.06 | 0.03 | 0.02 | 0.06 | 0.09 |
| Taroudante | 0.94 | 0.15 | 13.51 | 0.14 | 6.65 | 46.38 | 31.95 | 0.15 | 0.43 | 0.31 | 0.13 | 0.01 | 0.07 | 0.03 | 0.02 | 0.06 | 0.08 |
| Taroudante | 0.87 | 0.14 | 12.67 | 0.12 | 6.88 | 44.31 | 34.65 | 0.17 | 0.43 | 0.32 | 0.13 | 0.01 | 0.06 | 0.03 | 0.02 | 0.06 | 0.08 |
| Taroudante | 0.48 | 0.14 | 13.14 | 0.12 | 6.33 | 46.60 | 32.45 | 0.16 | 0.39 | 0.37 | 0.11 | 0.02 | 0.06 | 0.03 | 0.02 | 0.07 | 0.09 |
| Taroudante | 0.72 | 0.15 | 12.48 | 0.10 | 6.29 | 44.22 | 35.46 | 0.17 | 0.40 | 0.38 | 0.15 | 0.02 | 0.07 | 0.03 | 0.03 | 0.06 | 0.09 |
| Taroudante | 0.50 | 0.15 | 12.96 | 0.11 | 6.21 | 46.53 | 32.82 | 0.16 | 0.39 | 0.38 | 0.12 | 0.02 | 0.06 | 0.03 | 0.02 | 0.06 | 0.09 |
| Taroudante | 0.37 | 0.14 | 13.06 | 0.12 | 6.17 | 45.78 | 33.51 | 0.16 | 0.39 | 0.36 | 0.12 | 0.02 | 0.06 | 0.03 | 0.02 | 0.06 | 0.09 |
| Taroudante | 0.32 | 0.13 | 13.15 | 0.12 | 6.37 | 46.47 | 32.55 | 0.15 | 0.41 | 0.35 | 0.12 | 0.02 | 0.06 | 0.03 | 0.02 | 0.06 | 0.09 |
| Taroudante | 0.32 | 0.15 | 14.16 | 0.14 | 5.90 | 46.33 | 32.09 | 0.16 | 0.39 | 0.36 | 0.13 | 0.01 | 0.07 | 0.02 | 0.02 | 0.06 | 0.08 |
| Taroudante | 0.73 | 0.15 | 13.71 | 0.15 | 6.52 | 48.22 | 30.05 | 0.14 | 0.42 | 0.33 | 0.12 | 0.01 | 0.07 | 0.02 | 0.02 | 0.06 | 0.08 |
| Taroudante | 0.60 | 0.15 | 13.41 | 0.15 | 6.39 | 47.39 | 31.33 | 0.15 | 0.41 | 0.33 | 0.12 | 0.01 | 0.06 | 0.02 | 0.02 | 0.06 | 0.08 |
| Taroudante | 0.66 | 0.14 | 13.45 | 0.13 | 5.60 | 48.86 | 30.69 | 0.15 | 0.34 | 0.36 | 0.10 | 0.02 | 0.05 | 0.02 | 0.02 | 0.06 | 0.08 |
| Taroudante | 0.93 | 0.13 | 12.76 | 0.12 | 5.91 | 45.85 | 33.92 | 0.21 | 0.40 | 0.37 | 0.14 | 0.02 | 0.07 | 0.02 | 0.02 | 0.06 | 0.08 |
| Taroudante | 0.71 | 0.13 | 12.40 | 0.13 | 6.08 | 45.02 | 35.08 | 0.16 | 0.38 | 0.34 | 0.12 | 0.02 | 0.06 | 0.02 | 0.02 | 0.06 | 0.08 |
| Taroudante | 6.54 | 0.13 | 12.20 | 0.13 | 6.11 | 44.68 | 35.52 | 0.17 | 0.41 | 0.34 | 0.14 | 0.02 | 0.06 | 0.02 | 0.02 | 0.06 | 0.08 |
| Tiznite    | 0.43 | 0.13 | 12.63 | 0.11 | 5.59 | 48.09 | 32.21 | 0.18 | 0.39 | 0.39 | 0.12 | 0.02 | 0.06 | 0.02 | 0.02 | 0.06 | 0.08 |
| Tiznite    | 0.38 | 0.14 | 12.99 | 0.13 | 6.27 | 46.18 | 33.05 | 0.16 | 0.41 | 0.36 | 0.13 | 0.02 | 0.07 | 0.02 | 0.02 | 0.06 | 0.08 |
| Tiznite    | 0.77 | 0.13 | 13.36 | 0.14 | 6.82 | 45.90 | 32.46 | 0.15 | 0.43 | 0.32 | 0.12 | 0.01 | 0.07 | 0.02 | 0.02 | 0.06 | 0.08 |
| Tiznite    | 0.55 | 0.14 | 13.57 | 0.14 | 6.59 | 46.31 | 31.99 | 0.15 | 0.44 | 0.34 | 0.14 | 0.01 | 0.07 | 0.02 | 0.02 | 0.06 | 0.08 |
| Tiznite    | 1.52 | 0.13 | 13.57 | 0.13 | 6.28 | 47.44 | 31.23 | 0.14 | 0.40 | 0.35 | 0.12 | 0.01 | 0.07 | 0.02 | 0.02 | 0.06 | 0.09 |
| Tiznite    | 0.48 | 0.14 | 15.20 | 0.17 | 6.50 | 47.95 | 28.82 | 0.14 | 0.43 | 0.33 | 0.12 | 0.01 | 0.08 | 0.02 | 0.02 | 0.06 | 0.08 |
| Tiznite    | 0.61 | 0.16 | 14.03 | 0.15 | 6.43 | 47.67 | 30.28 | 0.14 | 0.45 | 0.36 | 0.14 | 0.01 | 0.08 | 0.02 | 0.02 | 0.06 | 0.08 |

---

|         |      |      |       |      |      |       |       |      |      |      |      |      |      |      |      |      |      |
|---------|------|------|-------|------|------|-------|-------|------|------|------|------|------|------|------|------|------|------|
| Tiznite | 0.38 | 0.14 | 13.22 | 0.14 | 6.68 | 45.89 | 32.70 | 0.16 | 0.43 | 0.32 | 0.13 | 0.01 | 0.07 | 0.02 | 0.02 | 0.06 | 0.08 |
| Tiznite | 0.49 | 0.17 | 14.87 | 0.17 | 6.27 | 48.20 | 29.14 | 0.15 | 0.43 | 0.31 | 0.12 | 0.01 | 0.07 | 0.02 | 0.02 | 0.06 | 0.08 |
| Tiznite | 0.22 | 0.14 | 12.61 | 0.12 | 5.49 | 46.97 | 33.50 | 0.16 | 0.35 | 0.38 | 0.11 | 0.02 | 0.05 | 0.02 | 0.02 | 0.06 | 0.08 |

---
